# Supplementary material for: Spirometry practice and the impact of a phase 1 training workshop among health workers in southern Nigeria: a cross-sectional study
Source: Springer Nature journal article supplement (doi:10.1186/s12890-020-01291-8), 2020-10-06
Supplement: MOESM1 [file 18454188]

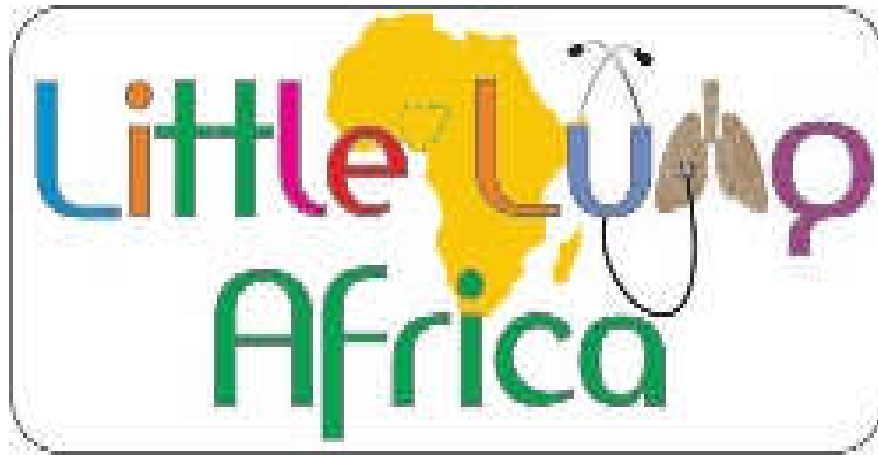

# Spirometry training course

...raising an army of spirometrists  
(the RIPPLE effect)

# SPIROMETRY TRAINING COURSE (LITTLE LUNG AFRICA)

## FACULTY

### TRAINERS AND QUALIFICATIONS

- **DR ADAEZE AYUK** – *CONSULTANT PEDIATRICIAN PEDIATRIC PULMONOLOGIST (UCT) - SPIROMETRY TRAINING -SOUTH AFRICA RED CROSS CHILDREN HOSPITAL/ CMSA; BARTS & THE LONDON HOSPITAL/QMUL; PATS MECOR TRAINING; ERS TRAINING – SUMMER SCHOOL; LEVEL 4 ERS DRIVERS LICENCE*
- **DR CHIZALU NDUKWU** - *CONSULTANT PEDIATRICIAN; ERS SPIROMETRY DRIVERS LICENCE; PATS MECOR TRAINING*
- **DR NNAMDI NWOSU** – *CONSULTANT RESPIRATORY PHYSICIAN; PATS MECOR SPIROMETRY TRAINING*
- **DR JOY EZE** -*CONSULTANT PEDIATRICIAN;; PATS MECOR TRAINING*

# Basis of the Training programme content (adapted from ERS)

## **Phase 1: Knowledge and basic skills**

- Teaching of theoretical course and completion of written tests including multiple-choice question assessment of the course and practical aspects taught

## **Phase 2: Knowledge and competence in measurement**

- It is recommended that participants complete this part within 3 - 12 calendar months of completing Part 1 and includes the completion of a training course which will focus on competency based training on practicing spirometry.

# GENERAL CURRICULUM

- **Part 1: Knowledge and basic skills AND Knowledge of competence in measurement (with supporting practice sessions)**
- Basic Lung Anatomy and Mechanics
- **Spirometry** Equipment.
- **Spirometry** Indications and Contraindications.
- Test Procedures.
- Criteria for Acceptability and Repeatability.
- Reversibility Testing. Office Procedures and Basic Interpretation.
- 
- Theory for spirometry
- Indications for test
- Instructions for test
- Contraindications of test
- Conduction of spirometry
- Interpretation of results of spirometry

# Outline(Phase 1)

- General overview of spirometry
- Indications/contraindications
- Preparing the patient and equipment
- Spirometry procedure/recognition of poor quality manoeuvres
- Reference equations
- Understanding the spirogram;
- Interpreting spirometry; Normal/abnormal results
- BDR testing
- Quality control/quality assurance
- Practice sessions

# PRACTICE SESSION

- Physiology of lung function testing and spirometry
- Indications and contraindications for spirometry
- Instructions for test
- Conduction of spirometry and quality control including calibration
- Interpretation of results of spirometry including real life spirograms
- BDR testing

# General overview of spirometry

# Physiology

## Lung Volume and Subdivisions

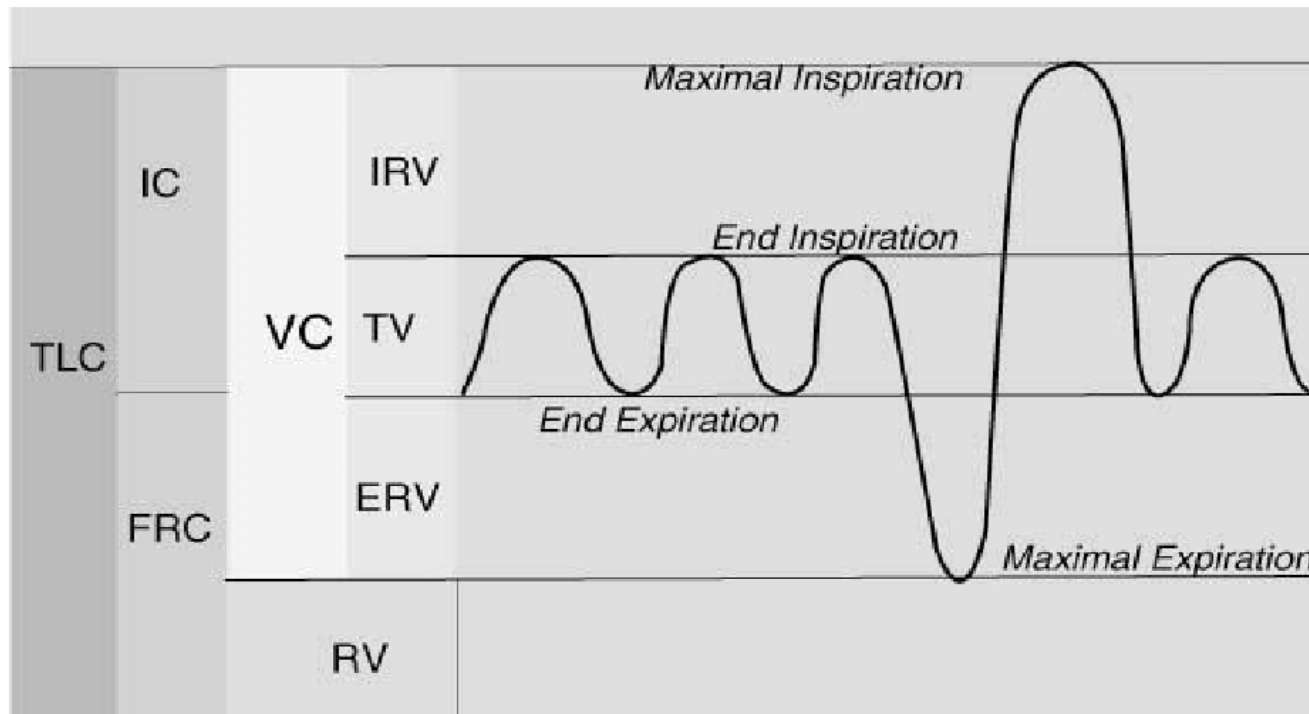



# What **lung function** measurements check

- Lung volumes - How much air volume can be moved in and out of the lungs
- How fast the air in the lungs can be moved in and out (flow)
- How stiff are the lungs and chest wall (lung compliance)
- The diffusion characteristics of the membrane through which the gas moves (oxygenation)
- How the lungs respond to chest physical therapy procedures

# Some indications for Pulmonary Function Testing

- Screening for the presence of obstructive and restrictive diseases
- Evaluating the patient prior to surgery especially if patients have:
  - pulmonary disease
  - pathologically obese
  - history of smoking, cough or wheezing
  - will be under anaesthesia for a lengthy period of time
  - are undergoing an abdominal or a thoracic operation
- Evaluating the patient's condition for weaning from a ventilator.
  - If the patient on a ventilator can demonstrate a vital capacity (VC) of 10 - 15 ml/Kg of body weight, it is generally thought that there is enough ventilatory reserve to permit weaning and extubation.
- Documenting the progression of pulmonary disease restrictive or obstructive
- Documenting the effectiveness of therapeutic intervention
- Epidemiological surveys

# Different lung function measuring techniques

- Spirometry
- Plethysmography
- Transfer factor (TLCO or DLCO)
- Forced Oscillation Technique
- Peak flow meter(PFM)
- Gas dilution methods

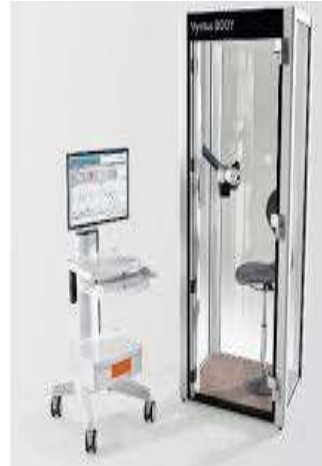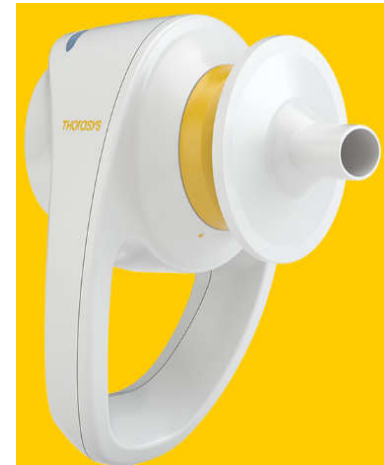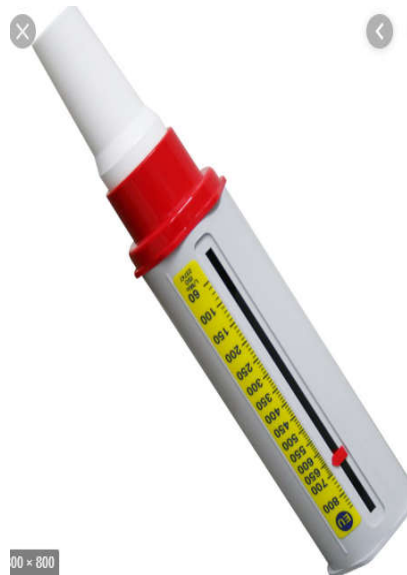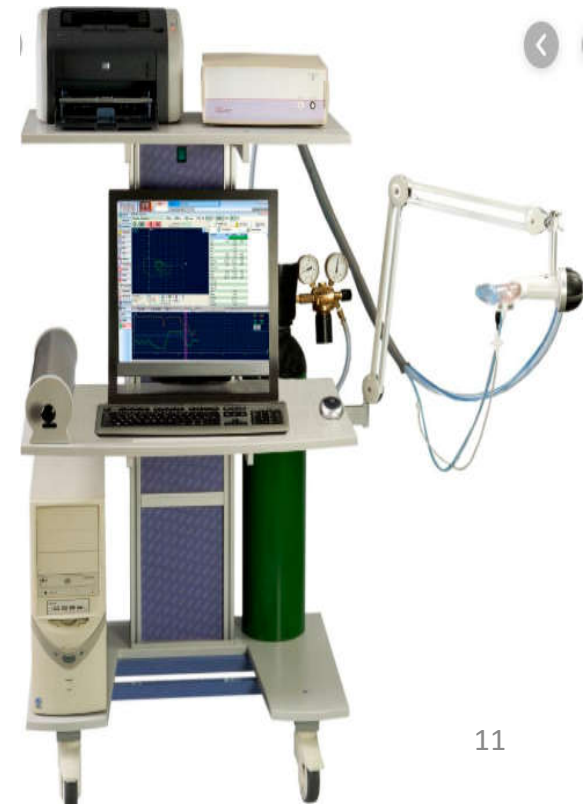

# SPIROMETRY

**spiro** – breathe; **meter** – to measure

- Spirometry is a physiological test that measures how an individual inhales or exhales volumes of air as a function of time.
  - - how much (volume) and how fast (flow)
- The primary signal measured in spirometry may be volume or flow.
- **Spirometry is invaluable as a screening test of general respiratory health in the same way that blood pressure provides important information about general cardiovascular health.**
- However, on its own, spirometry does not lead clinicians directly to an aetiological diagnosis

# Volume displacement spirometers (older mechanics)

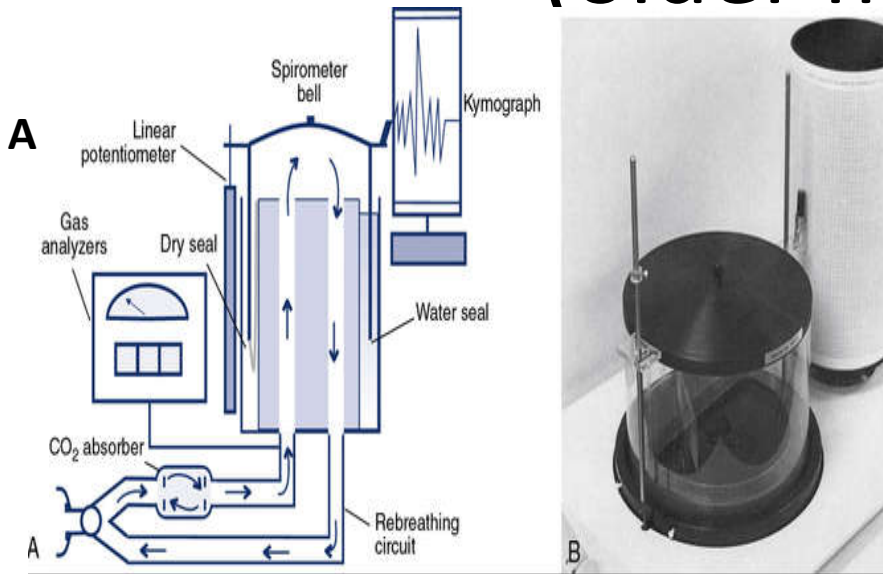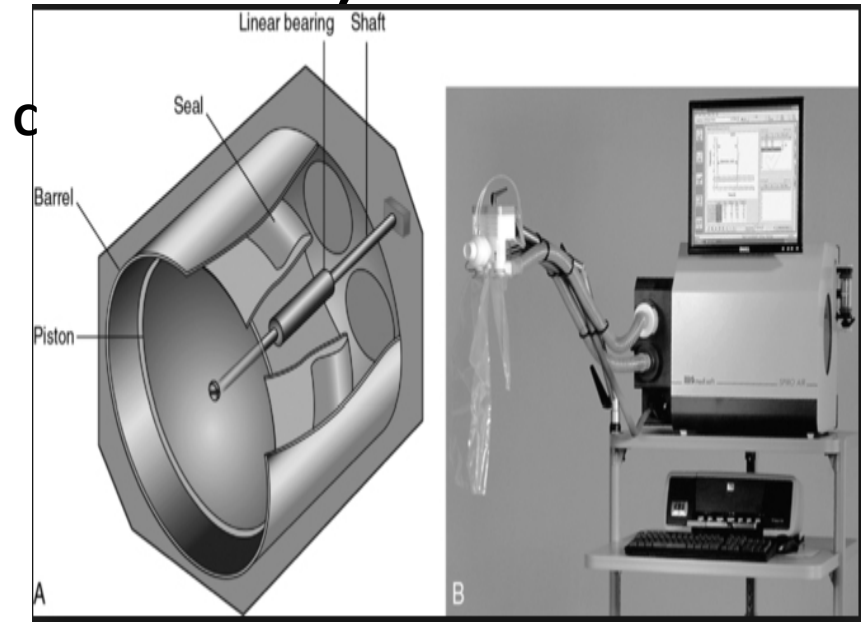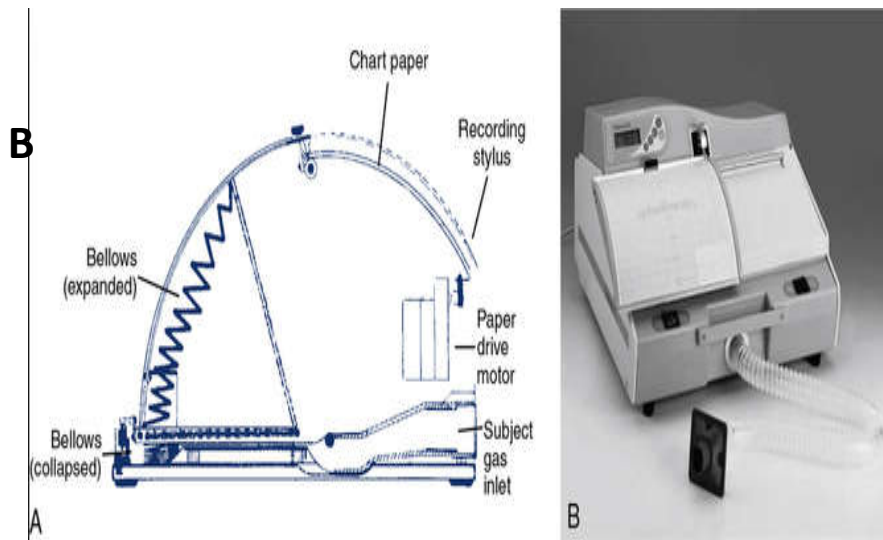

- A. Water-seal and Dry-seal spirometers**
- B. Wedge bellows spirometer**
- C. Dry rolling seal spirometer**

# Various types/mechanics of spirometers –using FLOW

- A. **Pressure-differential flow** sensors – pneumotachograph
- B. **Heated wires flow** sensors – anemometers, thermistor
- C. Pitot tube **flow** sensors
- D. Electronic **rotating vane/turbine flow** sensor
- E. **Ultrasonic flow** sensors

# Flow sensing spirometers

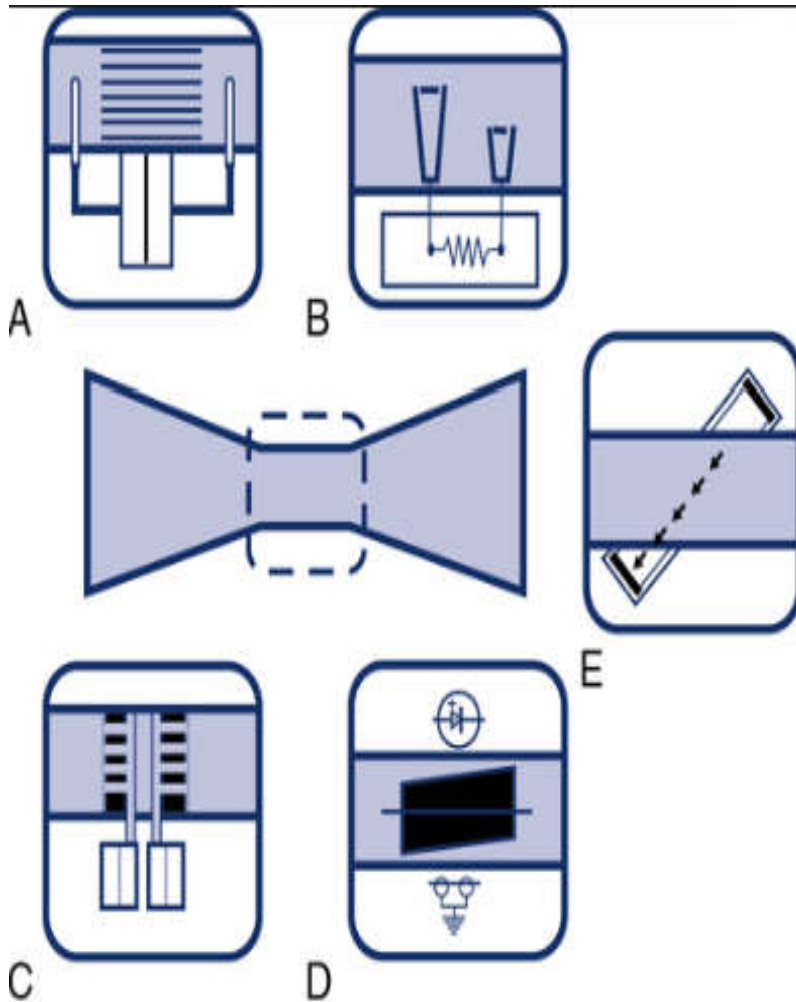

- A. **Pressure-differential flow** sensors – pneumotachograph
- B. **Heated wires flow** sensors – anemometers, thermistor
- C. Pitot tube **flow** sensors
- D. Electronic **rotating vane/turbine** flow sensor
- E. **Ultrasonic** flow sensors

# Pressure differential spirometers

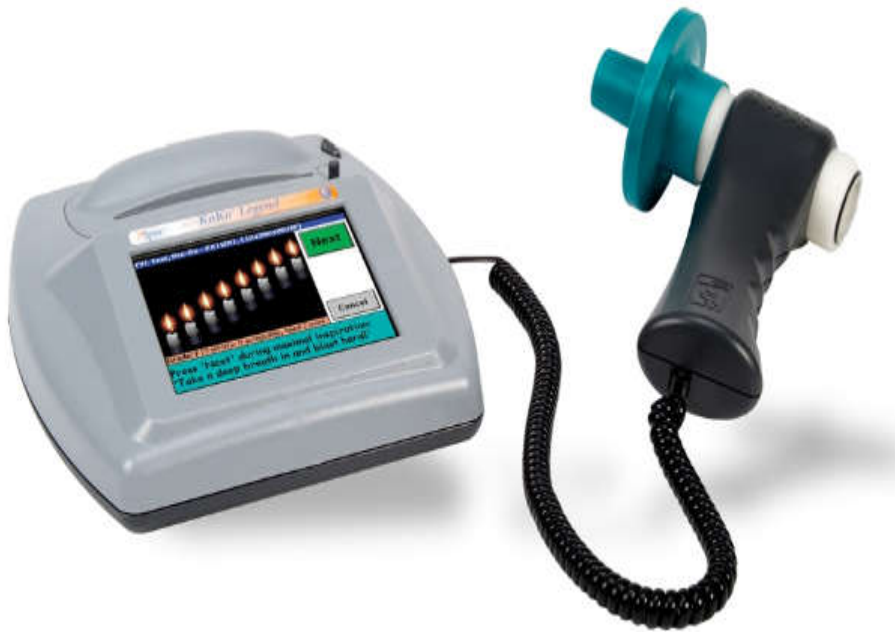

Koko  
spirometer

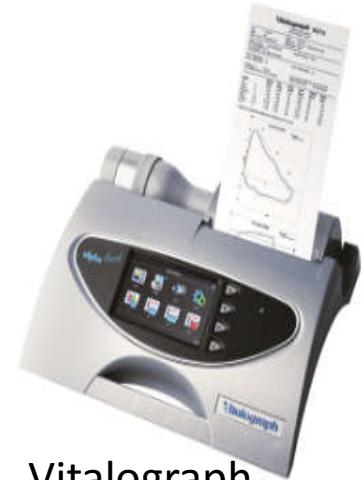

Vitalograph

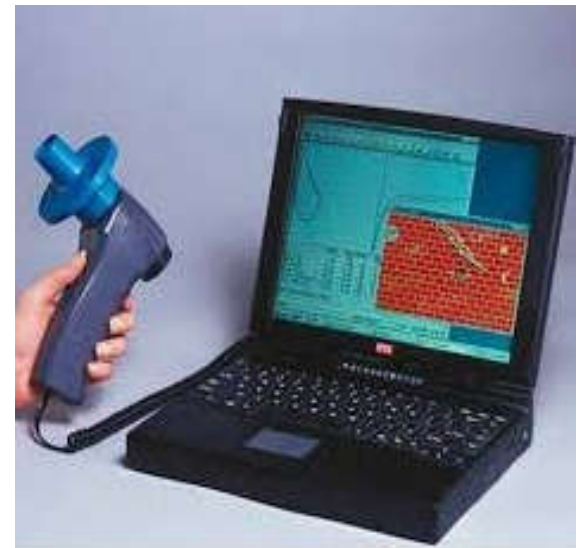

Koko spirometer



# Turbine spirometers

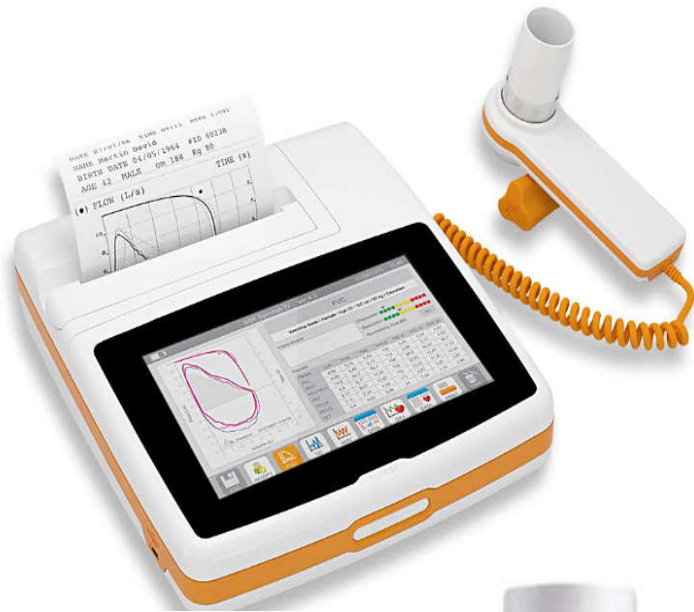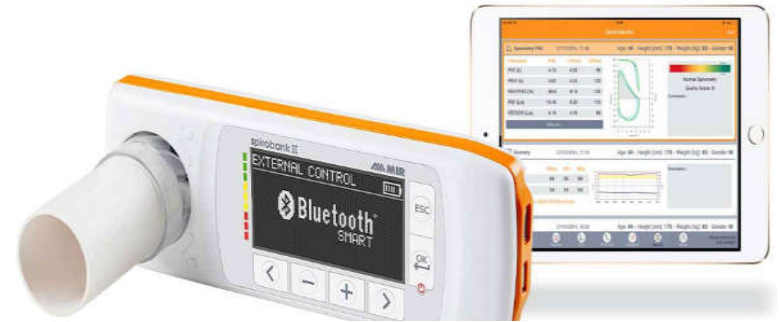

Spirolab

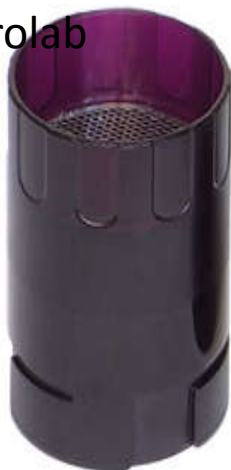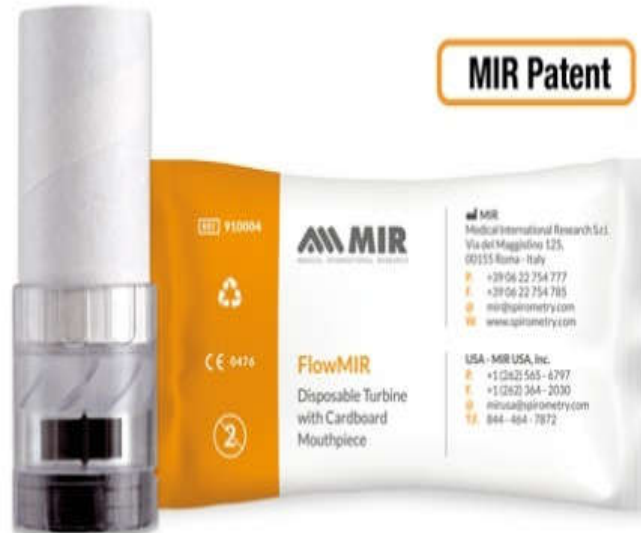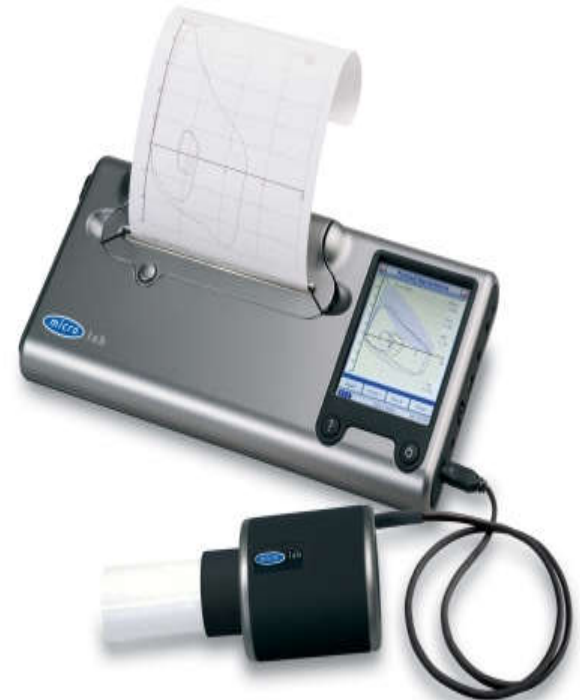

Carefusion

# Ultrasonic spirometers

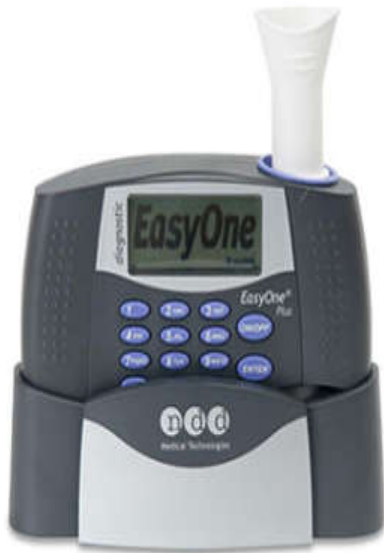

Easyone spirometer

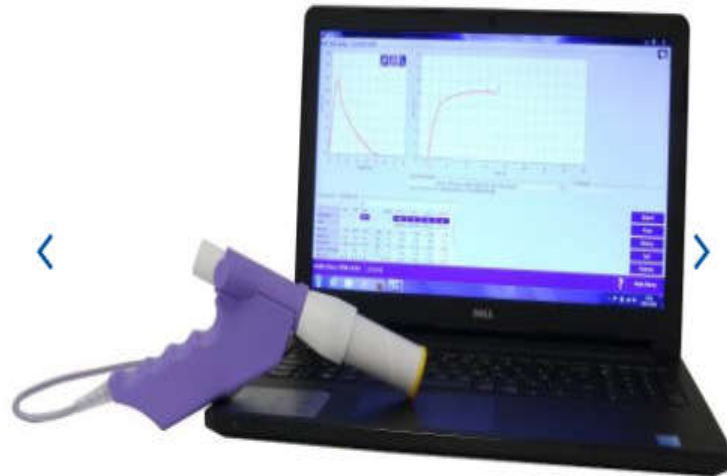

Easy-on spirometer with software

# Why do Spirometry?

- Diagnosing
- Monitoring
- Disability evaluation
- Public health

# Indications

## Diagnostic

- To evaluate symptoms, signs or abnormal laboratory tests
- To measure the effect of disease on pulmonary function
- To screen individuals at risk of having pulmonary disease
- To assess pre-operative risk
- To assess prognosis
- To assess health status before beginning strenuous physical activity

## Monitoring

- To assess therapeutic intervention
- To describe the course of diseases that affect lung function
- To monitor people exposed to injurious agents
- To monitor for adverse reactions to drugs with known pulmonary toxicity

## Disability/impairment evaluations

- To assess patients as part of a rehabilitation programme
- To assess risks as part of an insurance evaluation
- To assess individuals for legal reasons

## Public health

- Epidemiological surveys
- Derivation of reference equations
- Clinical research

# What are the most important measurements?

- **FVC:** Forced Vital Capacity is the maximal volume of air exhaled with maximally forced effort from a maximal inspiration (expressed in litres)
  - volume delivered during an expiration made as forcefully and completely as possible starting from full inspiration
- **FEV1:** Forced Expiratory Volume in the first second (FEV1) is the maximal volume of air exhaled in the first second of a forced expiration from a position of full inspiration (expressed in litres)
  - the volume delivered in the first second of an FVC maneuver

# FEV1/FVC

## Ratio of FEV1 to FVC

- it indicates what percentage of the total FVC was expelled from the lungs during the first second of forced exhalation
- This value is critically important in the diagnosis of obstructive and restrictive diseases.
- It is expressed as percent (%)

# Other parameters and what they mean

- PEF
- FEV6
- FEF 25
- FEF 50
- FEF 25-75
- FEF 75
  - (difference between FEF and MEF)
  - Maximal instantaneous forced expiratory flow MEF 75 (when 75% is remaining) is identical to FEF 25, which is maximal instantaneous forced expiratory flow where 25% of the FVC has been expired.
- BEV
- EOT

# Equipment needed for Spirometry

- The operator (certified every 3 years)
- The cooperative patient – patient preparation
- The right environment/weather
- Weather meter
- Spirometer
- Calibration syringe
- Weight/height scale
- Mouth piece/nose clip
- Filter/facemask
- Waste bag
- pMDI/spacer
- BP machine



# Performing spirometry

- Apply a nose clip to the patient's nose (this is recommended but not essential – be consistent)
- Urge the patient to: – Breathe in fully (must be absolutely full)
- Seal his/her lips around the mouthpiece
- Immediately blast air out as fast and as far as possible until the lungs are completely empty
- Breathe in again as forcibly and fully as possible (if inspiratory curve is required)
- Repeated severally until 3 identical efforts are recorded
- Bronchodilator given and test repeated (if required)

- To ensure an acceptable result, the FVC manoeuvre must be performed with maximum effort immediately following a maximum inspiration.
- It should have a rapid start and the spirogram and flow-volume curve should be a smooth continuous curve.
- To achieve good results, carefully explain the procedure to the patient, ensuring that he/she is sitting erect with feet firmly on the floor
- Use the most comfortable position for the patient, though standing gives a similar result in adults.
- Constant verbal encouragement required – “keep going”

# In children

- Children give more consistent results sitting, and chances of syncope from effort, reduced.
- Need for demonstration
- Need for practice with balloon (and the peak flow meter)
- Need for incentive spirometry (has drawbacks)

# Ensure ....

- There are no leaks
- No cough (note FEV1 may be valid if cough occurs after the first second)
- No glottis closure (Valsalva)
- No obstruction of the mouthpiece (e.g. by the tongue or teeth)
- No evidence that the patient took an additional breath during the expiratory manoeuvre
- Keep going until a plateau is seen
- Use very vigorous effort right from the start of the manoeuvre and continuing until absolutely no more air can be exhaled
- No leaning forward during the test
- Obtain at least 3 acceptable tests that meet repeatability criteria.

# Spirometry preparations- before you start

- Patient data into the machine
- BPTS
- Reference equations choice
- Other parameters (configuration)
- Choice of best trial/best value

# Acceptability Criteria

- The patient must have followed instructions
- A continuous maximal expiratory manoeuvre throughout the test (i.e. no stops and starts) should be achieved initiated from full inspiration
- No evidence of hesitation during the test/no slow start
- Test was performed with a **rapid** start
- PEF has a **sharp** rise (flow-volume)
- No **premature termination**, i.e. expiration continued until there was no change in volume
- The patient had blown for  $\geq 3$  seconds/plateau achieved (children aged  $< 10$  years) or for  $\geq 6$  seconds ( $\geq 10$  years).
- FET-.....6 sec/plateau
- BEV -.....A BEV  $> 150$  mL or PEFT  $> 120$  ms indicates a **slow** start.
- EOTV- 0.05L in last 2 secs

**REPEATABILITY CRITERIA** – 3 tests/blows within 0.15L of each other (0.1L if FVC  $< 1$ L)

# Acceptability criteria

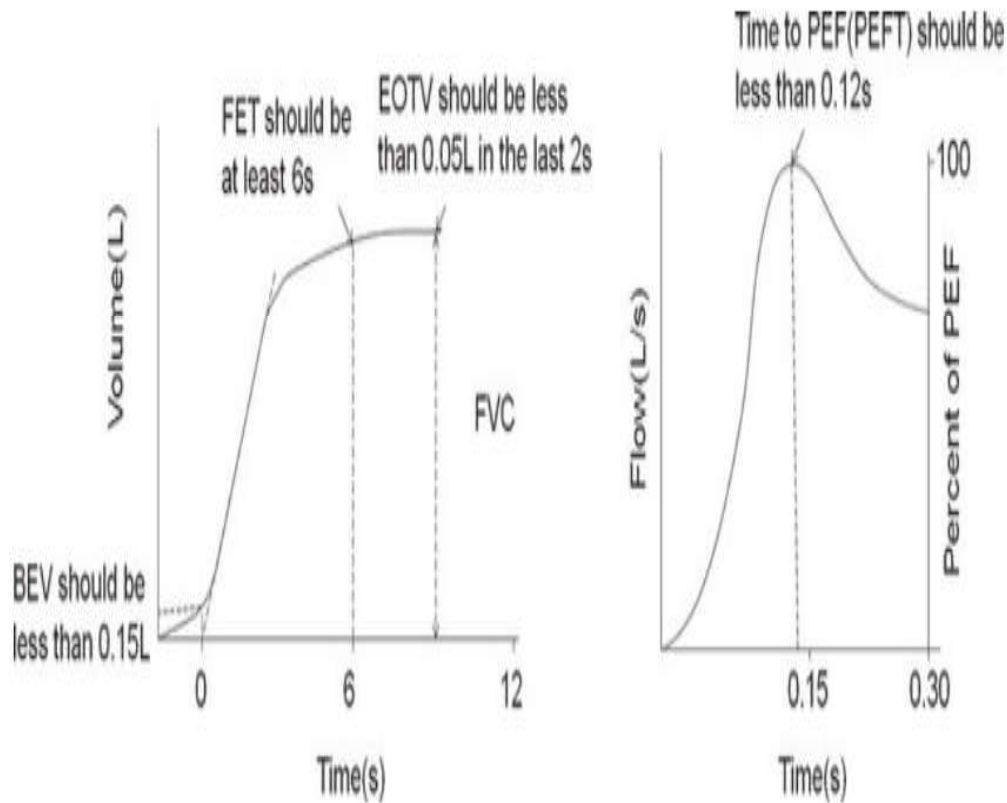

Figure 1. Acceptability Criteria [ BEV, PEFT, FET, EOTV] for Spirometry tracings depicted in schematic drawings of Volume vs time and Flow vs time curves. BEV = back extrapolated volume; PEFT = time to peak expiratory flow; FET = forced expiratory time; EOTV = end of test volume as indication of presence of plateau.

This figure was uploaded by Kenneth R Chapman

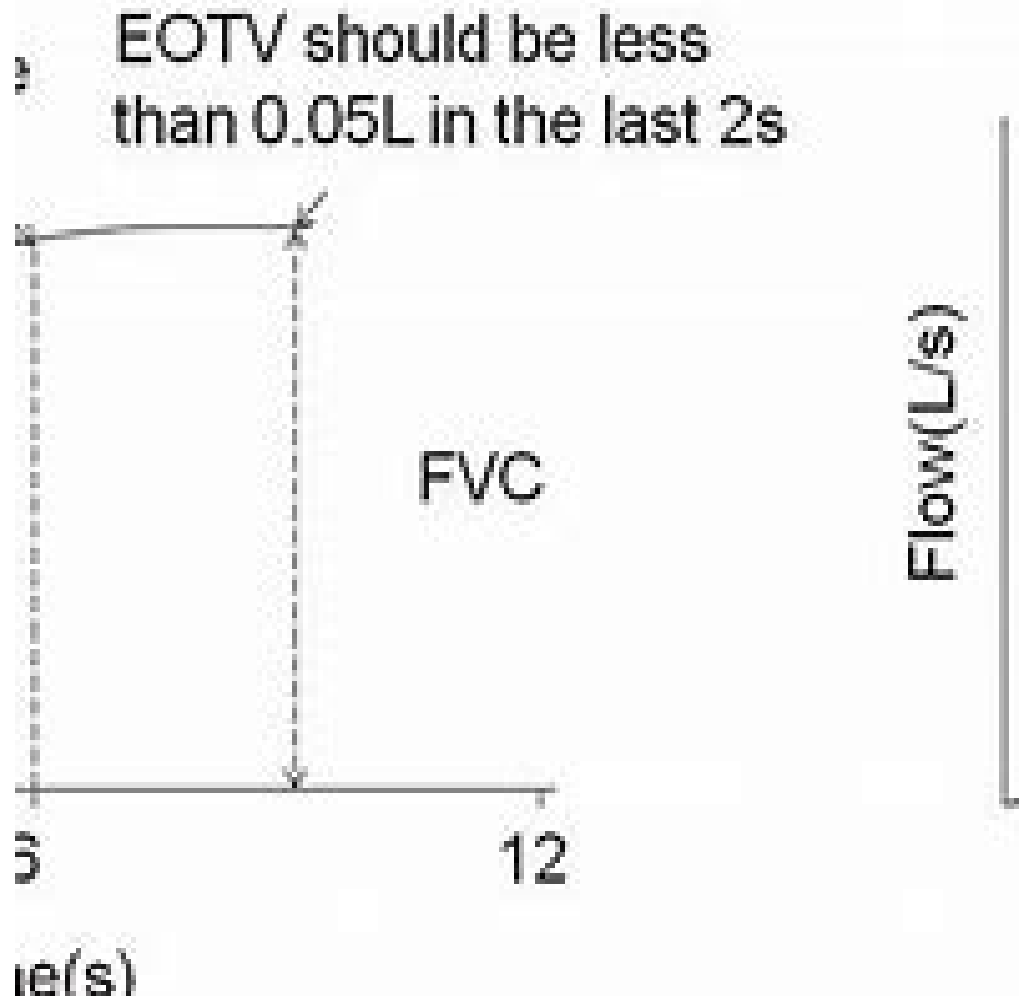

**Nb: In CURRENT GUIDELINES, end of test criteria (EOT) no longer requires a patient to have achieved an expiration time of 3 or 6 seconds (depending on age) but rather that there is less than 0.0025L change in volume for at least 1 second**



# UNDERSTANDING DIAGRAMS IN SPIROMETRY

# Diagrammatic representation of spirometry

- **Spirogram:** A spirogram is a **volume-time** curve, flow measured over a time period, usually 6 seconds
- **Flow-Volume curve:** Measures of **flow** can be made as a function of volume, thus generating a flow-volume curve ,
  - the shape is reproducible for any individual (signature) but varies considerably between different lung diseases.

# Spirogram

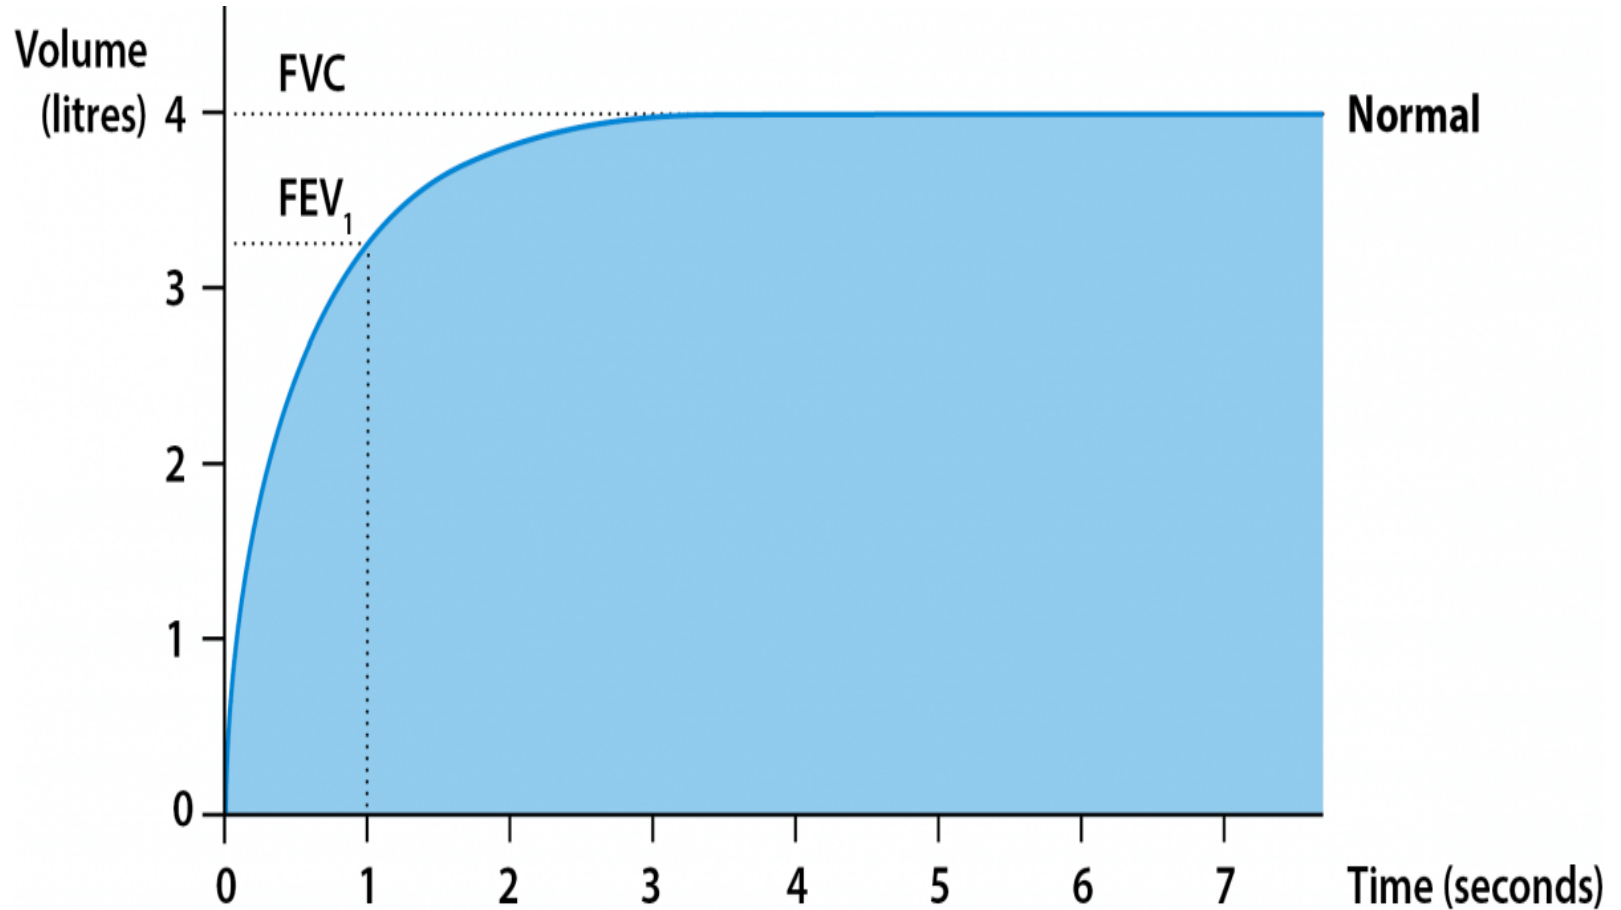

# Flow-volume loop

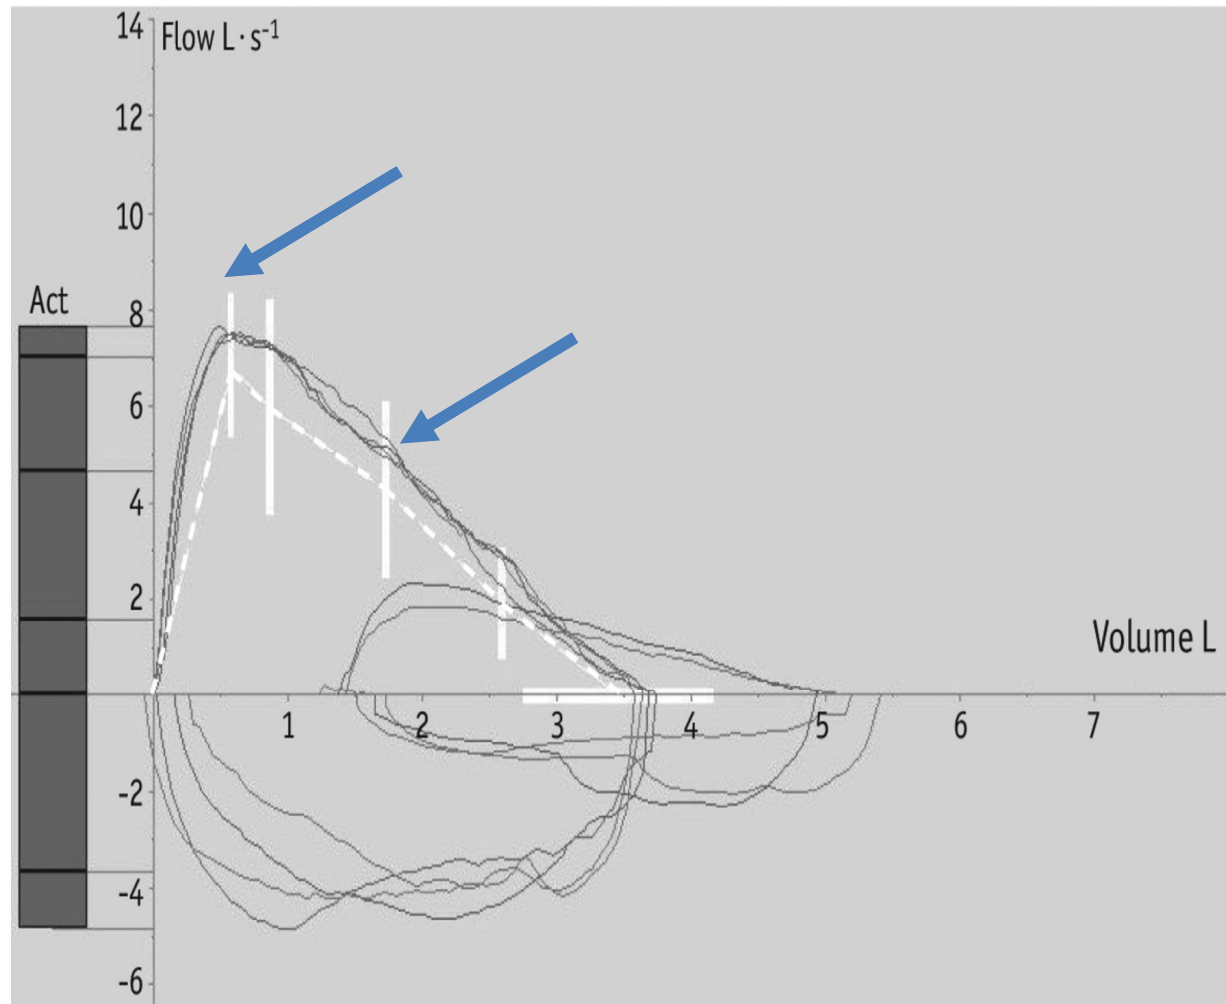

# Interpretation of Tests

- Configuration of flow-volume curve
  - Look at the shape and contour of the loop
- Look at the forced expiratory time (FET)
  - Is it  $> 4$  sec for kids and  $> 6$  sec for adults?
- Relationship between FVC,  $FEV_1$ ,  $FEV_{25-75\%}$
- Response to inhaled bronchodilators

MARTINI DAVID - Male - Age 32 - 180 cm - 76 kg - Caucasian

Baseline Spirometry

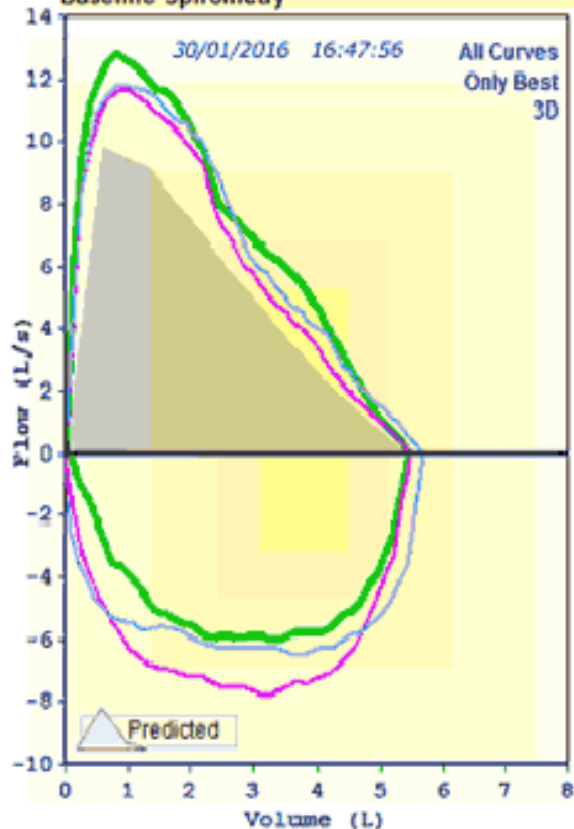

| Best Values |             |
|-------------|-------------|
| Parameters  | % Predicted |
| FVC         | 5,68 104    |
| FEV1        | 5,12 113    |
| PEF         | 11,91 121   |
| FEV1%       | 83,8 101    |

FVC PRE Session List  
 30/01/2016 (\*) (\*) POST

Conclusion / Medical report

V.t Curve / Test Info

Interpretation  
 Normal Spirometry

Repeatability  
 Repeatabile FVC

Quality Report  
 Breathe out for a longer time, Breathe out ALL air in the lungs

| Parameters    | LLN - ULN    | Pred. | FVC   |       |         | FEV1  |       |         | FEV1%   |         |         |
|---------------|--------------|-------|-------|-------|---------|-------|-------|---------|---------|---------|---------|
|               |              |       | PRE   | %Pred | Z-score | PRE   | %Pred | Z-score | PRE # 1 | PRE # 2 | PRE # 3 |
| FVC (L)       | 4,41 - 6,51  | 5,46  | 5,68  | 104   | 0,35    | 5,45  | 5,47  | 5,68    |         |         |         |
| FEV1 (L)      | 3,66 - 5,38  | 4,52  | 5,12  | 113   | 1,14    | 4,03  | 4,85  | 5,12    |         |         |         |
| FEV1/FVC (%)  | 73,0 - 93,3  | 83,2  | 90,1  | 108   | 1,12    | 85,0  | 88,7  | 90,1    |         |         |         |
| PEF (L/s)     | 6,39 - 13,23 | 9,81  | 11,91 | 121   | 1,01    | 10,00 | 11,73 | 11,91   |         |         |         |
| ELA (Years)   |              | 32    | 32    | 100   |         | 32    | 33    | 33      |         |         |         |
| FEF2575 (L/s) | 2,96 - 6,52  | 4,74  | 4,90  | 103   | 0,15    | 4,90  | 5,88  | 6,38    |         |         |         |
| FET (s)       |              | 6,00  | 2,06  | 34    |         | 2,06  | 2,88  | 2,78    |         |         |         |
| EVOL (mL)     |              |       | 120   |       |         | 120   | 140   | 160     |         |         |         |
| FIVC (L)      | 4,41 - 6,51  | 5,46  | 5,41  | 99    | -0,07   | 5,41  | 5,56  | 5,78    |         |         |         |
| FEV1/VC (%)   | 73,0 - 93,3  | 83,2  | 83,8  | 101   | 0,10    | 75,8  | 79,4  | 83,8    |         |         |         |
| FEV6 (L)      | 4,41 - 6,51  | 5,46  | 0,00  |       |         |       |       |         |         |         |         |
| FEV1/FEV6 (%) |              | 82,8  | 0,0   |       |         |       |       |         |         |         |         |
| FEV3 (L)      | 4,16 - 6,05  | 5,10  | 0,00  |       |         |       |       |         |         |         |         |
| FEV3/FVC (%)  |              | 93,5  | 0,0   |       |         |       |       |         |         |         |         |
| FEF25 (L/s)   | 5,79 - 12,41 | 9,10  | 12,02 | 132   | 1,45    | 12,02 | 10,94 | 11,36   |         |         |         |

- Set as Best
- Best (ATS)
- Delete

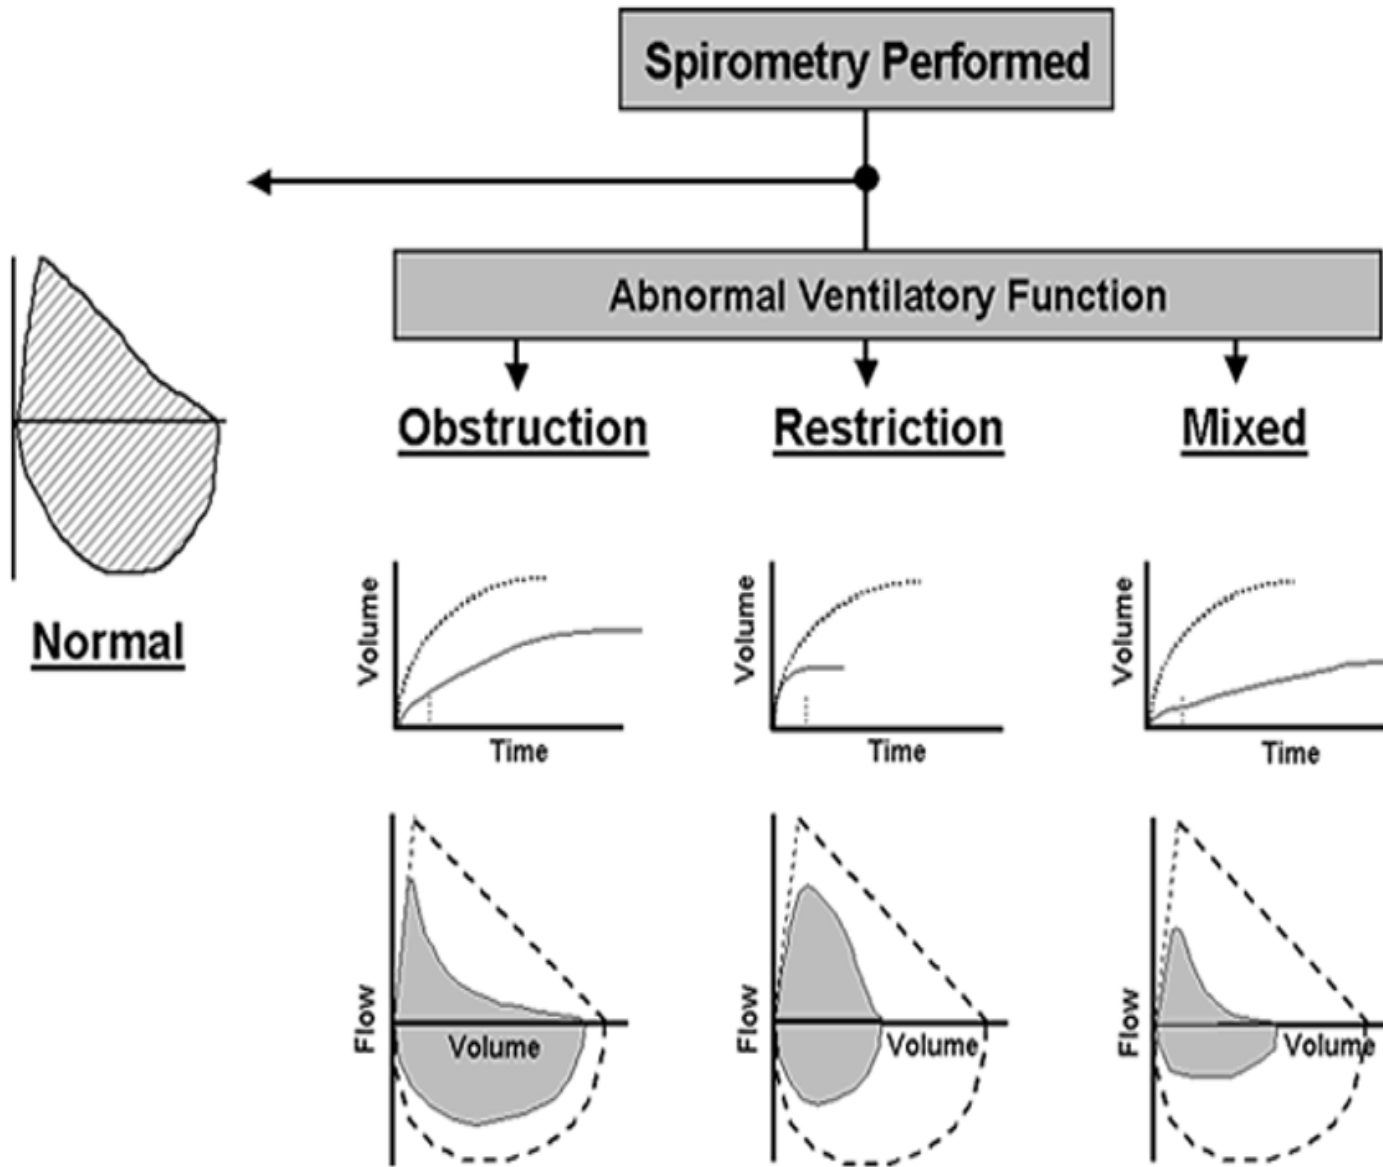

# Recognition of poor quality manoeuvres

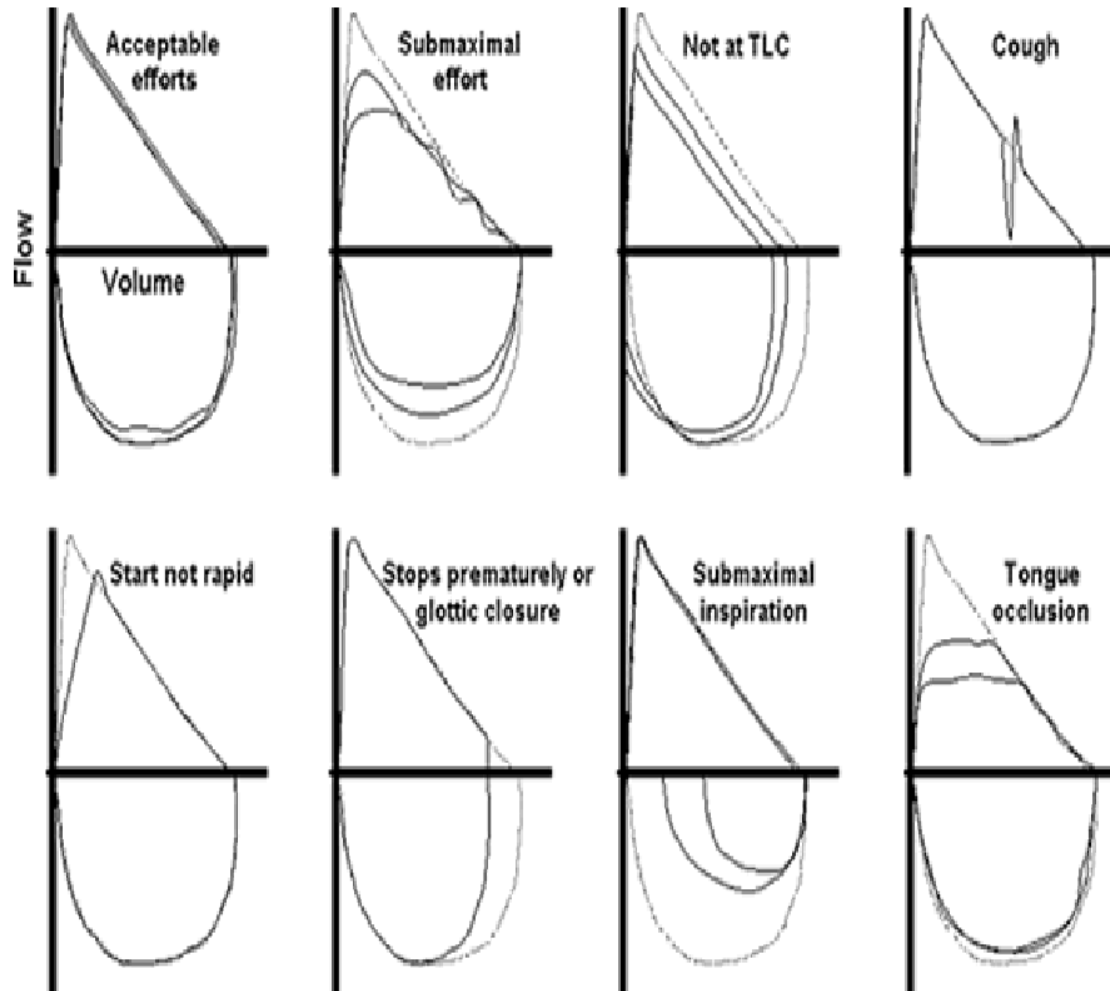



# Using spirometry to comment on upper airway obstruction

Idealised examples of a) fixed, b) variable extrathoracic, and c) variable intrathoracic airway obstruction

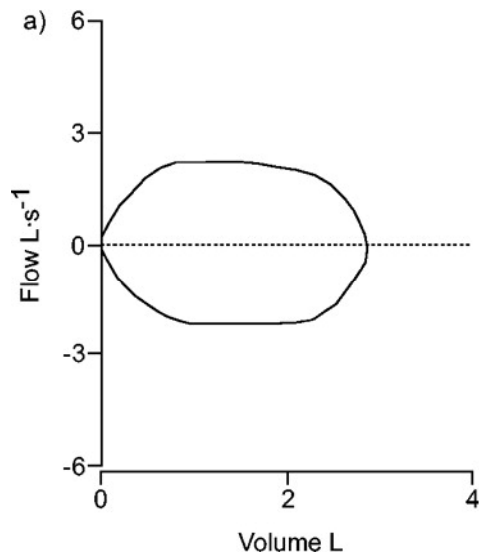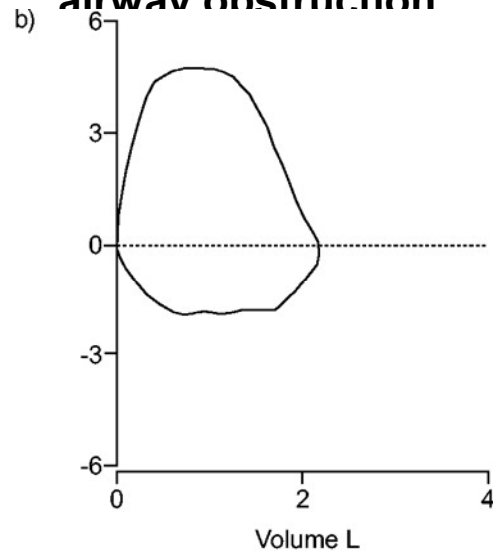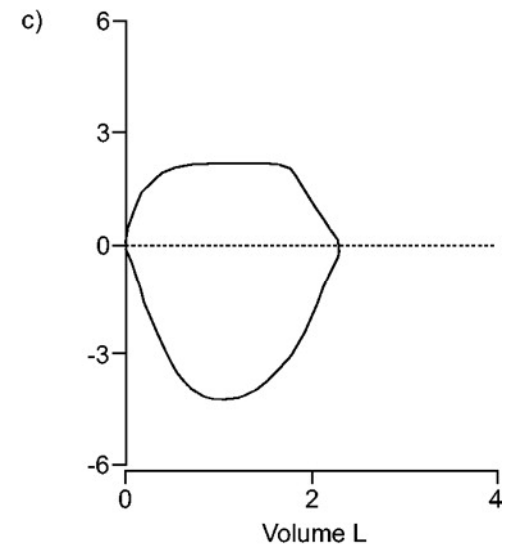

R. Pellegrino et al. Eur Respir J 2005;26:948-968

# Unacceptable manouvers ...repetition for emphasis!!!!

Unacceptable results:

#1. **Slow Start**

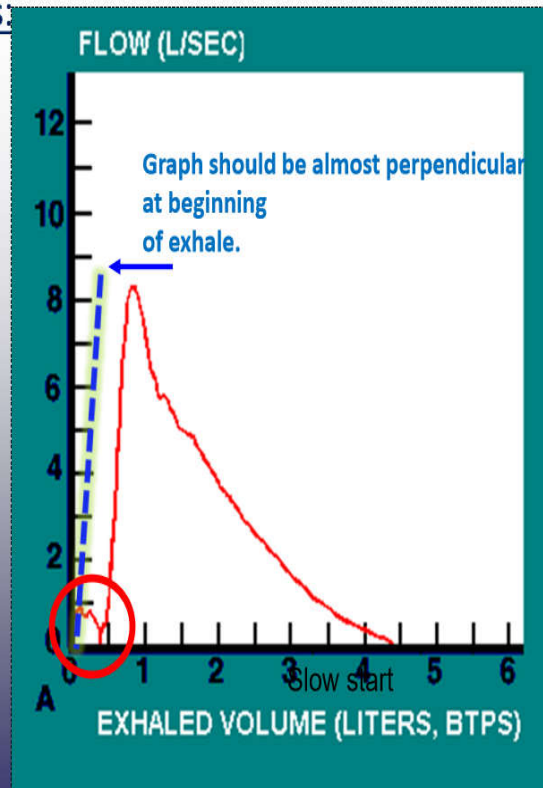

Unacceptable results:

## #2. Rounded Peak

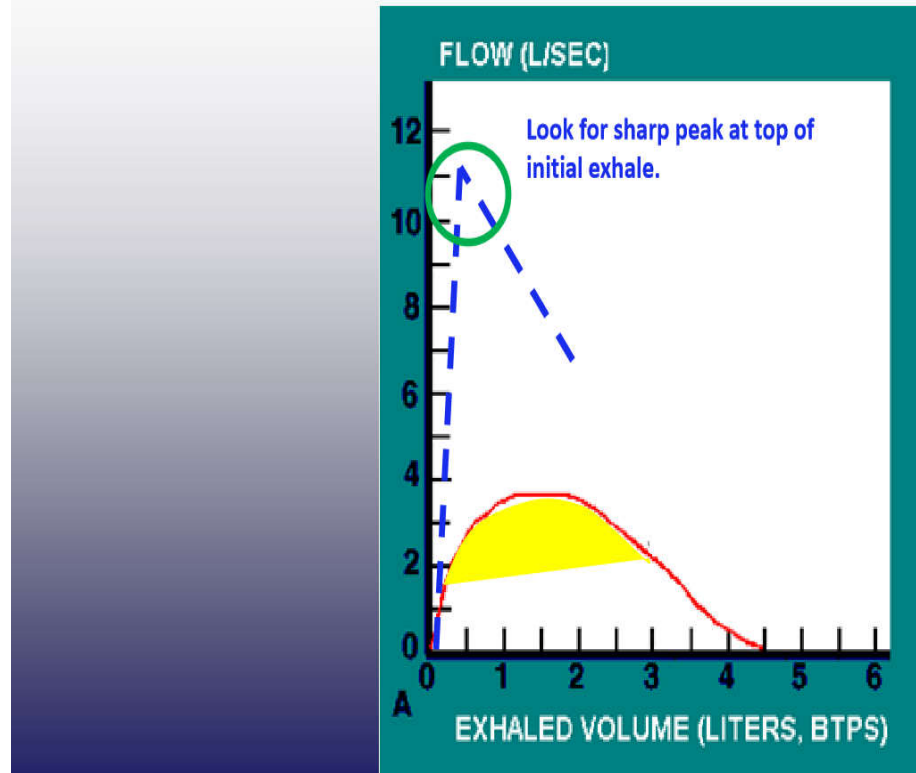

### #3. Early Termination

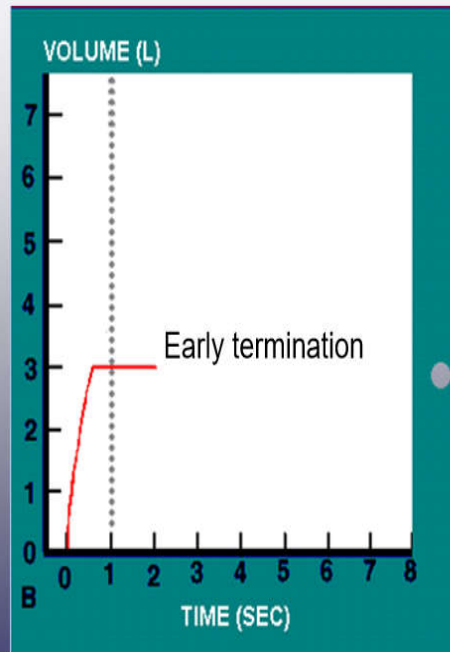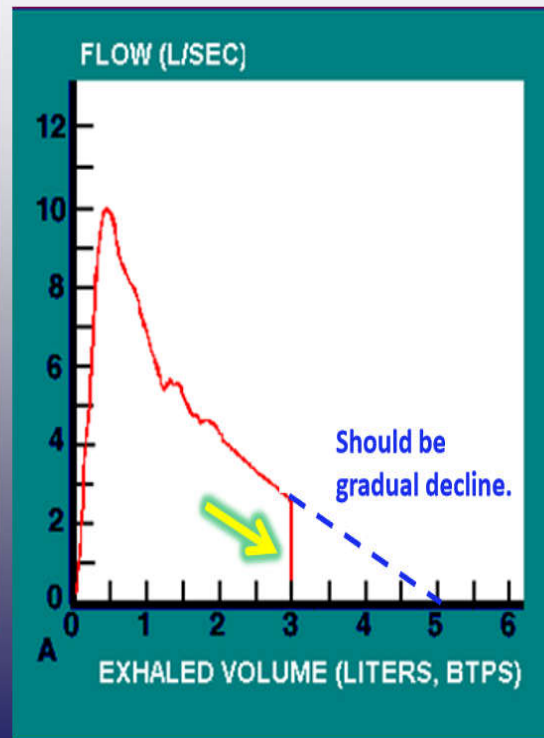

## #4. Coughing

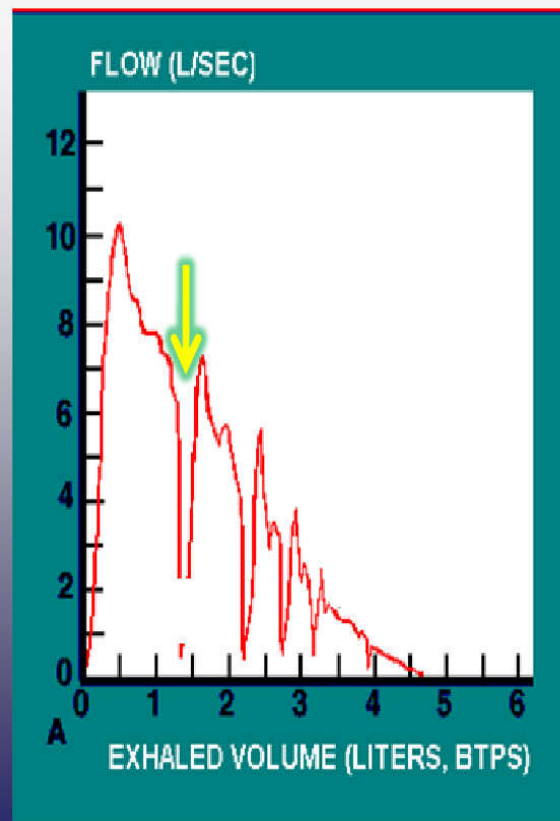

# Interpreting Spirometry

- Most important factors that influence lung volumes – stature, gender, age, ethnicity
- To interpret pulmonary function tests in any individual, compare the results with reference values obtained from a well-defined population of normal subjects
  - matched for sex, age, height and ethnic origin
  - using similar test protocols;
  - and carefully calibrated/validated instruments.

A simplified algorithm that may be used to assess lung function in clinical practice.

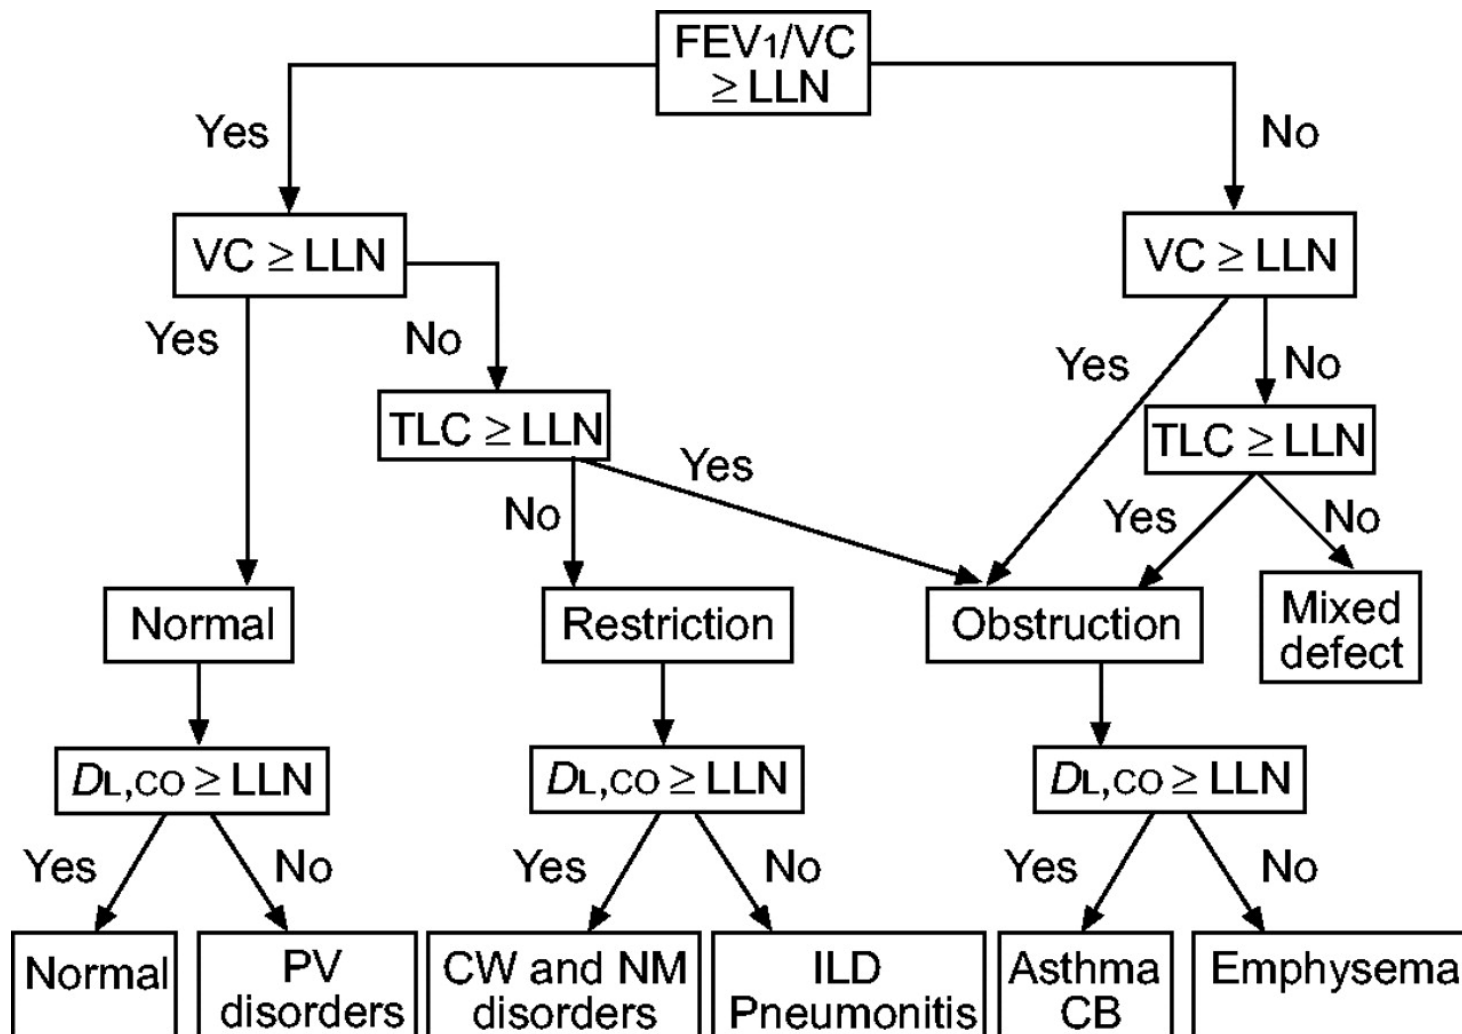

R. Pellegrino et al. Eur Respir J 2005;26:948-968

# Reference equations

- Results are measured against a healthy population similar to the patient
  - Consider – age; height, gender and ethnicity
  - Consider the clinical history (current and past eg exprem)
- ERS/ATS/BTS • ECSC- European Coal and Steel Community •
- **NHANES III** • GOLD, BOLD • Tiffaneau, Knudson, Hu, Crappo, Paoletti, Polgar and Zapletal, Stanojevic
- **New GLI (Quanjer)– expressed as %predicted or Z SCORE or LLN (lower limit of normal)**



# Z SCORE

## FORMULA

$$Z = \frac{(x - \bar{x})}{s}$$

Where:

Z = standard score/z-score

X = Raw Score

$\bar{x}$  = Mean

S = Standard Deviation

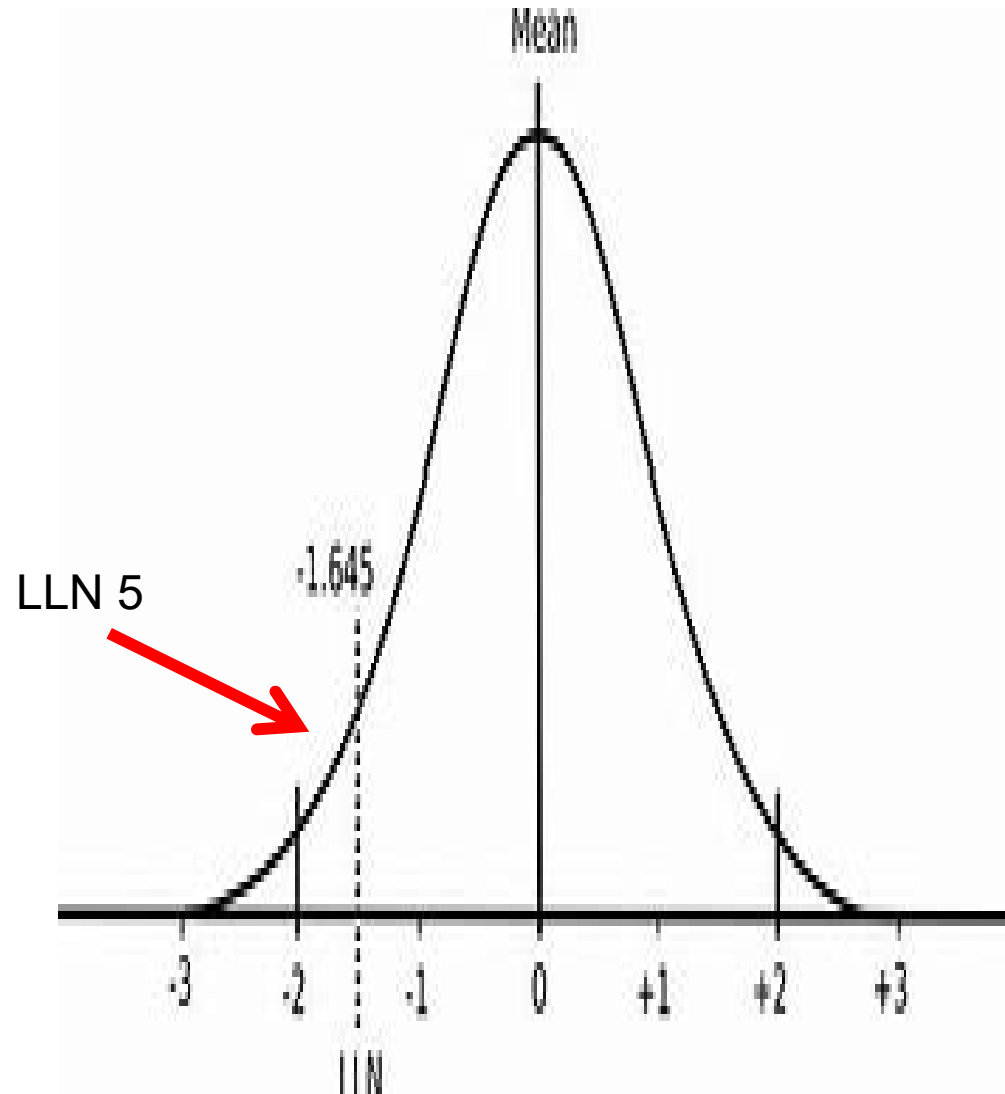

# Difference between best value and best trial

- The best values (highest FVC and FEV1) obtained from **different tests** among the best acceptable trials
- The best trial/test is the test from **one acceptable** curve with the highest **SUM** of FVC and FEV1
- MOST WOULD SET THEIR MACHINES TO RECORD BEST TEST

# Interpretation of the **best test**

- **Step 2.** Look at the forced vital capacity (**FVC**) to see if it is within normal limits for age, sex, race.
- **Step 1.** Look at the ratio of FEV to FVC section [remember it's the ACTUAL ratio and NOT the %predicted]
  - If FEV1/FVC is 80% (70) or higher,- it may be normal or restricted
  - If the FEV1/FVC is lower than 80 (70)% or lower, then the patient may have an obstructed lung disease (**keep in mind newer LLN standard cutoffs**)
- **Step 3.** Look at the forced expiratory volume in one second (**FEV1**) and determine if it is within normal limits.
- **Step 4.** If both FVC and FEV1 are normal - the patient has a normal PFT
- **Step 5.** If FVC and/or FEV1 are low, then the presence of disease is highly likely – restrictive/obstructive, mixed
  - then interpret with the ratio of FEV to FVC finding (in the absence of TLC/DLCo reading).

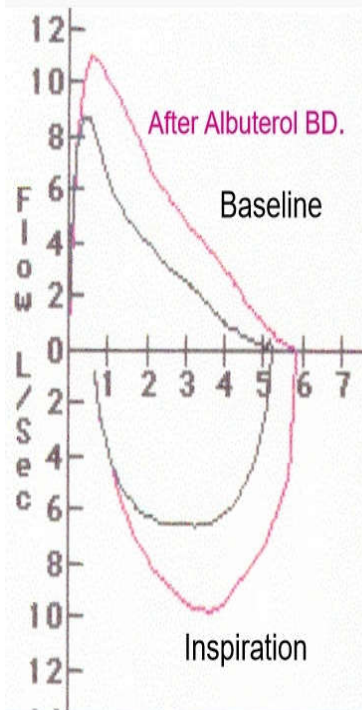

|                   | <u>Baseline</u> |      | <u>Post BD</u> |      |
|-------------------|-----------------|------|----------------|------|
| <b>FVC</b>        | 5.22            | 91%  | 5.88           | 103% |
| <b>FEV1</b>       | 3.73            | 78%  | 4.71           | 99%  |
| <b>FEV1/FVC</b>   | 71%             |      | 80%            |      |
| <b>FEFmax</b>     | 8.80            | 101% | 10.45          | 120% |
| <b>FEF(25-75)</b> | 1.74            | 34%  | 4.18           | 83%  |

- Reversible Airflow Obstruction
- FEV1 increased 15% after bronchodilation

# Quality control/quality assurance

# QUALITY ASSURANCE

Quality assurance in spirometry refers to the procedures put in place in the

- ✓ environment,
- ✓ equipment,
- ✓ technician and
- ✓ the subject

**before, during and after** spirometry testing to reduce variability in spirometry measurements.

# Quality control

- These are the checks we do to ensure that the spirometer/software is measuring accurately (truthfully) and precisely, every time
- Quality control means that regardless of any adjustment required, the process of checking that that equipment must be accomplished
- Must be applied on a **routine** basis
- It is a part of quality assurance

# Calibration

- Quality assurance and calibration should not be confused
- Calibration ensures that before a spirometry test is performed the device would have been prepared to measure the volume and flow rates and they are achieved with accuracy and precision
- Prior to the actual pumping of air using the syringe a zero flow check is done by the spirometer.



- When 3 litres of air is injected (x3) into the spirometer, the spirometer should measure three litres or within + or – 3.5% (=105mls i.e 2895 – 3105mls)
  - Should measure the same results every time on every syringe stroke
    - This is known as precision
- For linearity testing this is done at three different flow rates
- Calibration results may suggest that an adjustment or compensation may be needed to render a spirometer as accurate and precise.
- Whilst quality control is closely tied to calibration it means more than the simple term of calibration alone.



# What you need for a calibration check

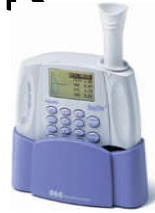

- Spirometer
- Certified 3 liter calibration syringe
- Correct adapter to syringe mouth/spirometer
- Spirometer mouthpiece
- Weather meter
  - Set spirometer on calibration Mode so that the spirometer does not convert the volume of dry room temperature gas to that at body temperature (37°C) and saturated with water vapor. The result will be an overestimation of 4% and 9% of the volume injected.

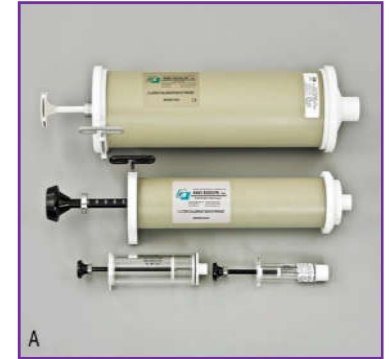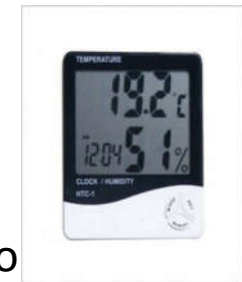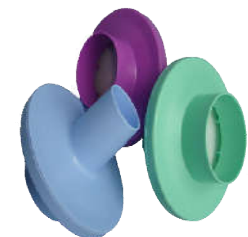

# The syringe needs to be cared for

- Moving the syringe plunger in and out to check that the action is smooth, without catching or stuttering
- The syringe should be tested for leaks routinely – suggested here on a weekly basis.
  - A leak in the volume chamber will result in volume loss and inaccurate results until repairs are made.
  - The leak test is performed by placing a hand over the outlet of the syringe and pressing the syringe plunger in/out. No air should escape
- Visual inspections of the syringe on a regular basis to check for any obvious defects
- Re-validated on a yearly basis or as specified by the manufacturer.

# What the calibration looks like

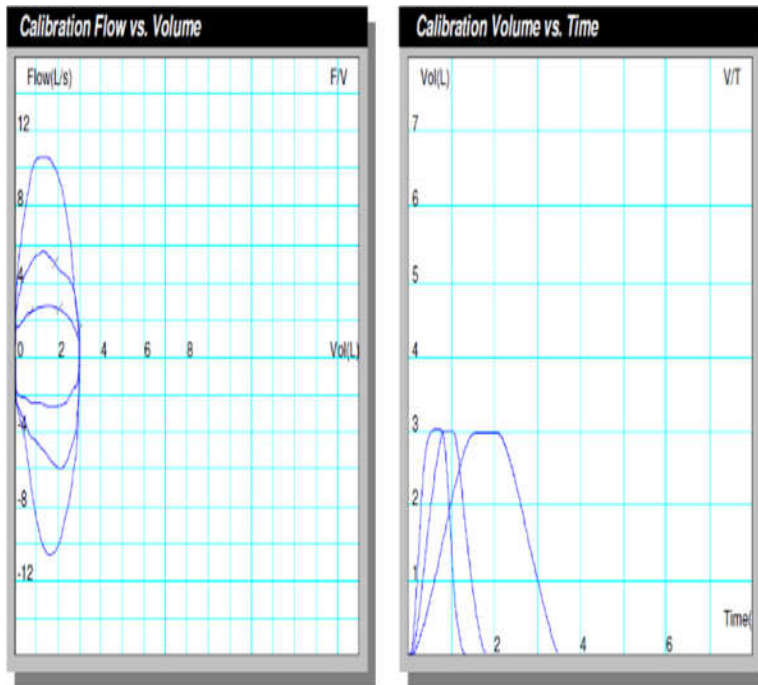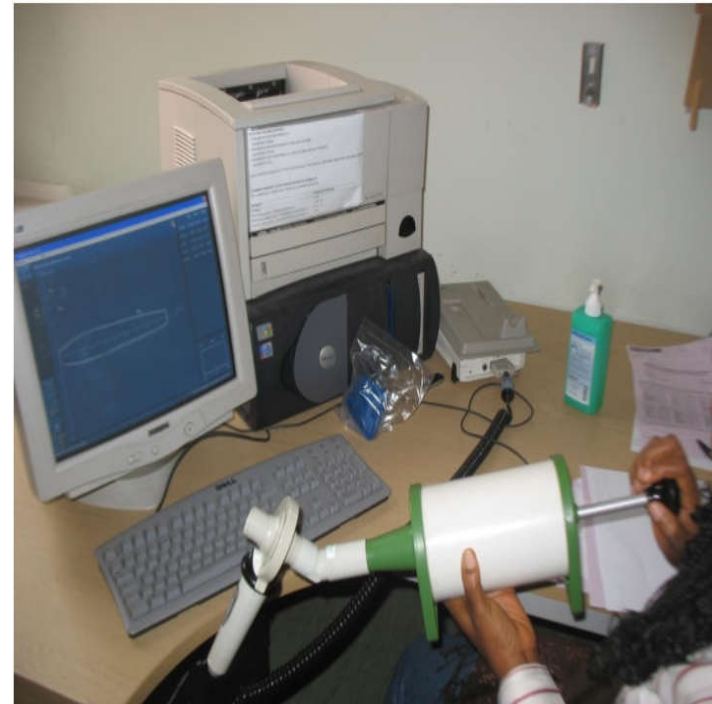

# Pneumotach Calibration Report

## Calibration Information

Pneumotach serial number: 2010K3716  
 Pneumotach ID: O-25E5-21CC-1BFC-15E6-25E5-2315-1EDF-1859-D

Room temperature (deg C): 22.0  
 Barometric pressure (mm Hg): 751.0  
 Relative humidity (%): 51.0

Pneumotach calibration date/time: 05/09/2017 02:10 PM  
 Pneumotach calibration expected volume (L): 3.00  
 Pneumotach calibration actual volume (L): 3.00

Number of efforts performed: 3  
 Pneumotach calibrated by: L vd Linden

## Results

| Result          | Expd | Meas | %Expd | Meas | %Expd | Meas | %Expd |
|-----------------|------|------|-------|------|-------|------|-------|
| FVC (L)         | 3.00 | 3.01 | 100%  | 2.98 | 99%   | 3.00 | 100%  |
| PEFR (L/s)      | ---  | 8.69 | ---   | 5.24 | ---   | 1.85 | ---   |
| FEF25-75% (L/s) | ---  | 7.73 | ---   | 4.77 | ---   | 1.64 | ---   |
| FIVC (L)        | 3.00 | 2.98 | 99%   | 2.95 | 98%   | 2.95 | 98%   |

## Calibration Flow vs. Volume

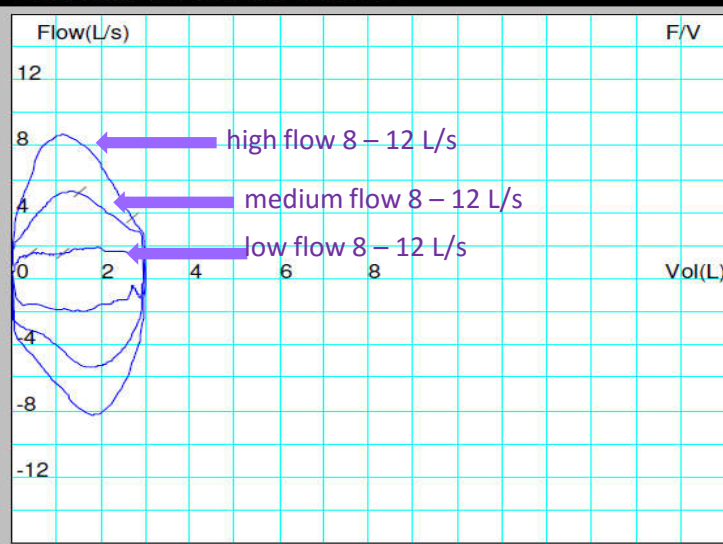

## Calibration Volume vs. Time

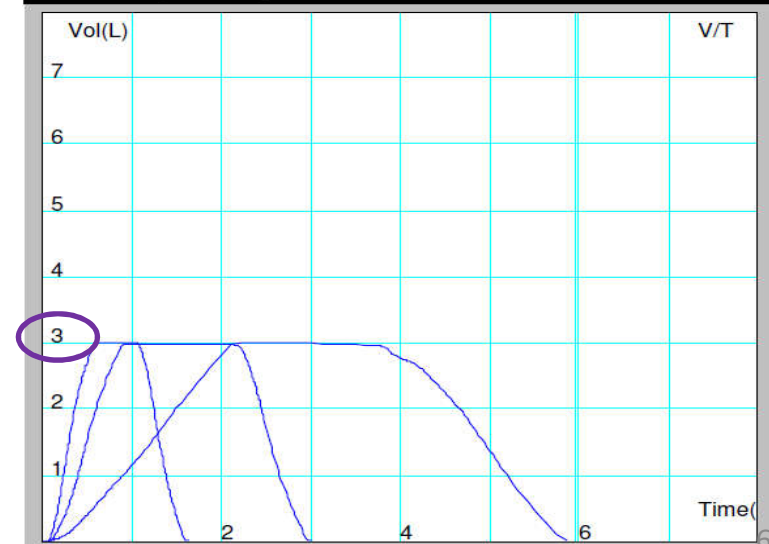

# Frequency of calibration

- Depends on the location/site the spirometer is being used – hot, humid, cold, freezing
- Type of spirometer – Ultrasonic flow sensors are not affected by weather conditions in the same way a turbine or pneumotach spirometer is. The later require more robust calibration routines
- The ATS / ERS guidelines: calibration verification should take place every day in normal departments and at least twice a day in busy departments.

# Biological Quality Control (BioQC)

- This involves using the lung function (instead of a calibration syringe) of a healthy non-smoking adult
  - ✓ who is readily available
  - ✓ with stable/normal lung function (PEFR above 550L/m)
  - ✓ measured/recorded on the same spirometer
  - ✓ at the same time of day
- A second BioQC subject should be identified and able to fill in if the primary BioQC subject cannot perform this function due to absence or illness



- Prior to performing spirometry on the control person one needs to determine the normal range for FVC and FEV1 for this person
  - This process known as “characterisation” is done by measuring 10 spirometry tests over a 2 week period
  - The mean value for each highest parameter is calculated by adding all 14 days of data for each value and then dividing by the number of tests done i.e. 14
  - Multiply the mean by 0.95 and 1.05 to obtain the acceptable operating range

# Bronchial Dilation Studies

- Albuterol 2 puffs (MDI) use a spacer!! Test the device! or 2.5mg/ml neb –
- If there is any question that the patient got an effective dose--give another puff.
- Wait 15 mins
- Pre testing must establish a solid baseline.
- Post test needs equivalent rapid rise time and equal or greater peak flows.

# Flow-volume loop

**Figure 1:** Example of flow-volume loop tracing. The solid trace shows FEV<sub>1</sub> before bronchodilator administration while the dotted trace shows FEV<sub>1</sub> 10 minutes later (FEV<sub>1</sub> increases by 18.5% from 2.7 litres to 3.3 litres). Note the slightly abnormal baseline tracing, which is concave

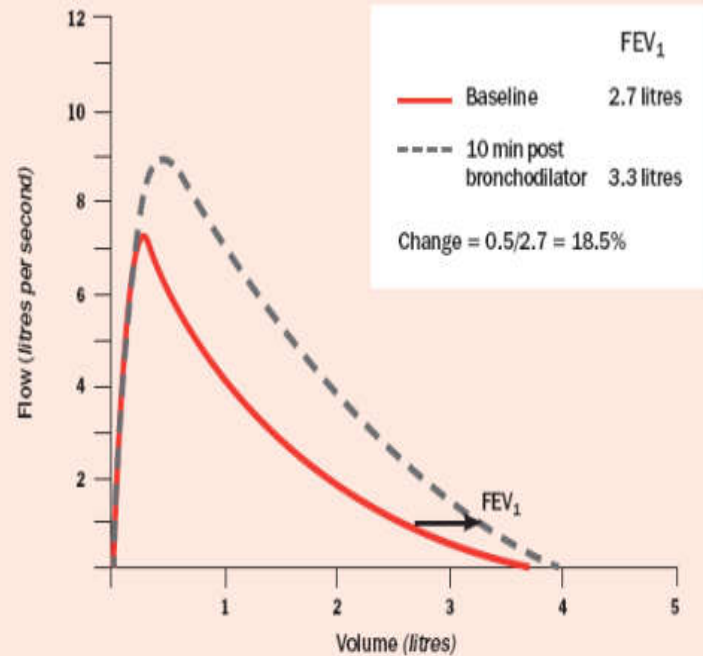

If a post bronchodilator test has been ordered, the results will show up next to the pre bronchodilator results.

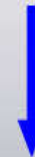

|           | Units | Predicted | Pre Actual | Pre % Pred | Post Actual | Post % Pred. | % Change |
|-----------|-------|-----------|------------|------------|-------------|--------------|----------|
| FVC       | L     | 5.82      | 4.19       | 72 %       | 3.00        | 52 %         | -29 %    |
| FEV1      | L     | 4.72      | 1.86       | 39 %       | 2.33        | 49 %         | 26 %     |
| FEV1/FVC  | %     | 82 %      | 44 %       | 54 %       | 78 %        | 95 %         | 34 %     |
| FEF25-75% | L/S   | 4.66      | 1.18       | 25 %       | 2.14        | 46 %         | 81 %     |
| PEF(L/M)  | L/Min | 642.7     | 135.8      | 21 %       | 326.9       | 51 %         | 141 %    |
| PIF       | L/S   |           |            |            |             |              |          |
| Exp. Time | Sec.  |           | 3.60       |            | 6.18        |              | 72 %     |
| MVV       | L/Min |           |            |            |             |              |          |
| VC        | L     | 5.82      |            |            |             |              |          |

# Spirometry Criteria for Asthma

- Airflow obstruction before therapy
  - $FEV_1 < 80\%$  of predicted
  - FEV1/FVC ratio  $< 80\%$ , or below lower limit of normal
- Reversibility
  - Improvement of  $\geq 12\%$  in  $FEV_1$  and/or  $\geq 200$  ml after treatment

# Possible complications and risks

## Generally safe

- SOB
- Dizziness from blow
- Trigger breathing problems
- Shakiness
- Nausea
- Fatigue

# When to postpone spirometry

- Haemoptysis of unknown origin
- Pneumothorax
- Unstable cardiovascular status, recent myocardial infarction or pulmonary embolism
- Thoracic, abdominal or cerebral aneurysms
- Recent eye surgery
- Acute disorders affecting test performance, such as nausea or vomiting
- Recent thoracic or abdominal surgical procedures
- Severe chest pain
- Severely elevated blood pressure

# What to consider when buying a spirometer

| <b>Feature / Specification</b>              | <b>Explanation</b>                                                                                                                               |
|---------------------------------------------|--------------------------------------------------------------------------------------------------------------------------------------------------|
| Spirometer and manufacturer                 | Identifies each spirometer by name and gives manufacturer name                                                                                   |
| Primary Australian distributor              | Name, address and contact phone number of the main supplier in Australia                                                                         |
| <b><i>Hardware</i></b>                      |                                                                                                                                                  |
| Portable or desktop                         | Indicates whether or not the spirometer is designed as a portable system                                                                         |
| Power supply                                | Describes the power source needed to operate the spirometer (e.g. batteries or mains power)                                                      |
| Sensor type                                 | Describes the physical principle employed to measure flow/volume e.g. turbine, ultrasonic, bellows                                               |
| Is external PC (not supplied) required      | Indicates whether the spirometer needs a separate external computer (not supplied) to run a spirometry test                                      |
| Internal or external (not supplied) printer | Indicates whether the spirometer is equipped with an internal printer or whether an external (not supplied) printer is required to print results |
| Weight (kg)                                 | Total weight of spirometer in kilograms                                                                                                          |
| Warranty period                             | Indicates time in years                                                                                                                          |



# What to consider when buying a spirometer

|                                          |                                                                                                                                                            |
|------------------------------------------|------------------------------------------------------------------------------------------------------------------------------------------------------------|
| <i>Costs</i>                             |                                                                                                                                                            |
| Cost of spirometer (ex GST)              | Current retail price of the spirometer in Australia as at June 2011 – GST may be payable (does not include <i>external PC</i> or <i>external printer</i> ) |
| Cost of disposables per patient (ex GST) | Estimated retail cost of consumables per patient (e.g. mouthpieces, other disposable items)                                                                |
| <i>Software</i>                          |                                                                                                                                                            |
| Patient storage capacity                 | Indicates how many individual patient results can be stored by the spirometer                                                                              |
| Type of database                         | Indicates the type of database used                                                                                                                        |
| Interpretation software included         | Indicates if the spirometer includes software for automatic clinical interpretation of the test results                                                    |
| Results download to clinical software    | Indicates whether the test results (numeric and/or graphic) are potentially available for download to another database (e.g. Medical Director)             |
| Provides feedback after each blow        | Indicates whether feedback is provided to encourage maximum performance during the test                                                                    |
| Provides grading of test quality         | Indicates whether the spirometer grades the overall quality of pre and post-bronchodilator trials                                                          |

# What to consider when buying a spirometer

|                                         |                                                                                                                                                                                                 |
|-----------------------------------------|-------------------------------------------------------------------------------------------------------------------------------------------------------------------------------------------------|
| <b><i>Reference Values</i></b>          |                                                                                                                                                                                                 |
| Reference values available              | Indicates whether the operator can select from a number of normal reference studies and provides examples                                                                                       |
| Includes lower limit of normal          | Indicates whether the statistically derived lower limit of normal (LLN) is printed on the final report (or used to provide the normal range) to facilitate interpretation of the measured value |
| Can add additional reference equations  | Indicates whether the user can enter other reference equations                                                                                                                                  |
| Can adjust for ethnicity                | Indicates whether the reference values can be adjusted for ethnicity                                                                                                                            |
| Prints predicted flow-volume curve      | Indicates whether the predicted flow-volume loop is printed on the report                                                                                                                       |
| <b><i>General Features</i></b>          |                                                                                                                                                                                                 |
| Indices measured                        | List of the <i>main</i> spirometric indices measured and printed/displayed by the spirometer (e.g. FEV <sub>1</sub> , FVC, FEV <sub>1</sub> /FVC, FEF <sub>25-75%</sub> , PEF)                  |
| Can user customise the final report     | Indicates whether the user can customise the report (e.g. select which indices appear on the final report)                                                                                      |
| Meets 2005 ATS/ERS performance standard | Indicates whether the spirometer meets the 2005 ATS/ERS performance standards                                                                                                                   |
| Is printed report user definable        | Indicates whether the user can customise the final printed report (e.g. user defined layout and select which indices appear)                                                                    |
| Daily calibration check recommended     | Indicates whether the manufacturer recommends that the spirometer requires its calibration to be adjusted or checked on a daily basis                                                           |

# What to consider when buying a spirometer

|                                         |                                                                                                                                                                                                     |
|-----------------------------------------|-----------------------------------------------------------------------------------------------------------------------------------------------------------------------------------------------------|
| Automatically adjusts calibration       | Indicates whether the accuracy of the spirometer can be adjusted by the user after calibration, or whether the adjustment can only be carried out by the distributor                                |
| Curves displayed in real-time           | Indicates whether a graphic display of the blow (e.g. flow-volume and/or volume-time curve) can be viewed as the subject performs the test                                                          |
| Prints volume-time / flow-volume curves | Indicates whether these curves can be printed                                                                                                                                                       |
| Provides serial report                  | Indicates whether the results from previous tests on a patient can be incorporated into the current report                                                                                          |
| Infection control precautions           | Indicates recommended method to minimise the risk of patient cross-infection (e.g. disinfection, disposable sensor, barrier filter)                                                                 |
| Report quantifies post-BD change        | Indicates whether any change in spirometry values post-bronchodilator administration can be printed on the final report to facilitate interpretation of the significance of bronchodilator response |
| Supplied with user manual               | Indicates whether the spirometer is supplied with a user manual                                                                                                                                     |
| Training can be provided on purchase    | Indicates whether the spirometer supplier can provide basic training on the use of the spirometer on purchase                                                                                       |

# References

- ERS/ATS guidelines
- NTS guidelines
